# Supplementary material for: INKA2, a novel p53 target that interacts with the serine/threonine kinase PAK4
Source: PubMed Central journal article supplement — Int J Oncol. 2019 Apr 15;54(6):1907–20. doi: 10.3892/ijo.2019.4786 (PMC6521941; doi:10.3892/ijo.2019.4786), 2019-04-15
Supplement: IJO-54-06-1907-Supplementary_Data.pdf [file IJO-54-06-1907-Supplementary_Data.pdf]

Figure S1. Alignment between putative p53 binding site and p53 binding motifs. The sequence logo from JASPAR database is compared to the predicted *INKA2/Inka2* binding sites, and to a refined consensus p53 binding motif (p53PET) with high prediction accuracy (18). *INKA2*, inka box actin regulator.

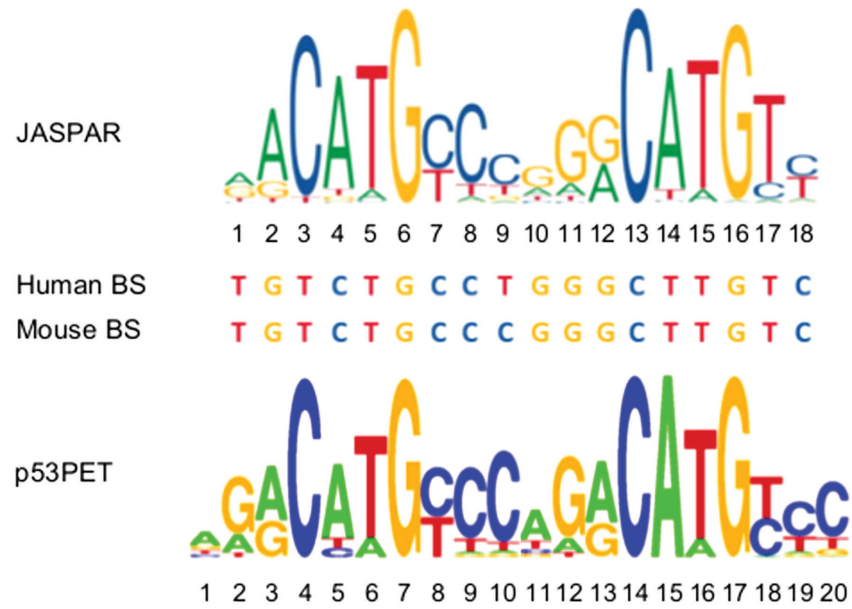

Figure S2. Complete screening data of *Inka2/INKA2*. (A) Fold induction of the 6 candidate genes in HCT116 (left panel) or MCF10A (right panel) cells. The y-axis represents the relative fold of the median expression of ADR treated group to the maximum expression among non-treated group, as described in the screening method. (B) Fold induction of *Inka2* expression in twenty-four mouse tissues. The y-axis represents the relative fold of the WX median expression to the maximum median expression among W, K and KX, as described in the screening method. (C) Levels of *Inka2* mRNA in tissues not satisfying the screening criteria. RNA-seq was performed on tissues from untreated *p53* wild-type (W) or knockout (K) mice, or on those dissected 24 h after irradiation with 10 Gy of X-rays (WX and KX). The expression levels are represented in fragment per kilobase million (FPKM). P-values were calculated between WX group and the group with a maximum median expression among W, K or KX by one-way ANOVA with Dunnett's post hoc test; \*P<0.05, \*\*P<0.01 and \*\*\*P<0.001. NS, not statistically significant. *INKA2*, inka box actin regulator.

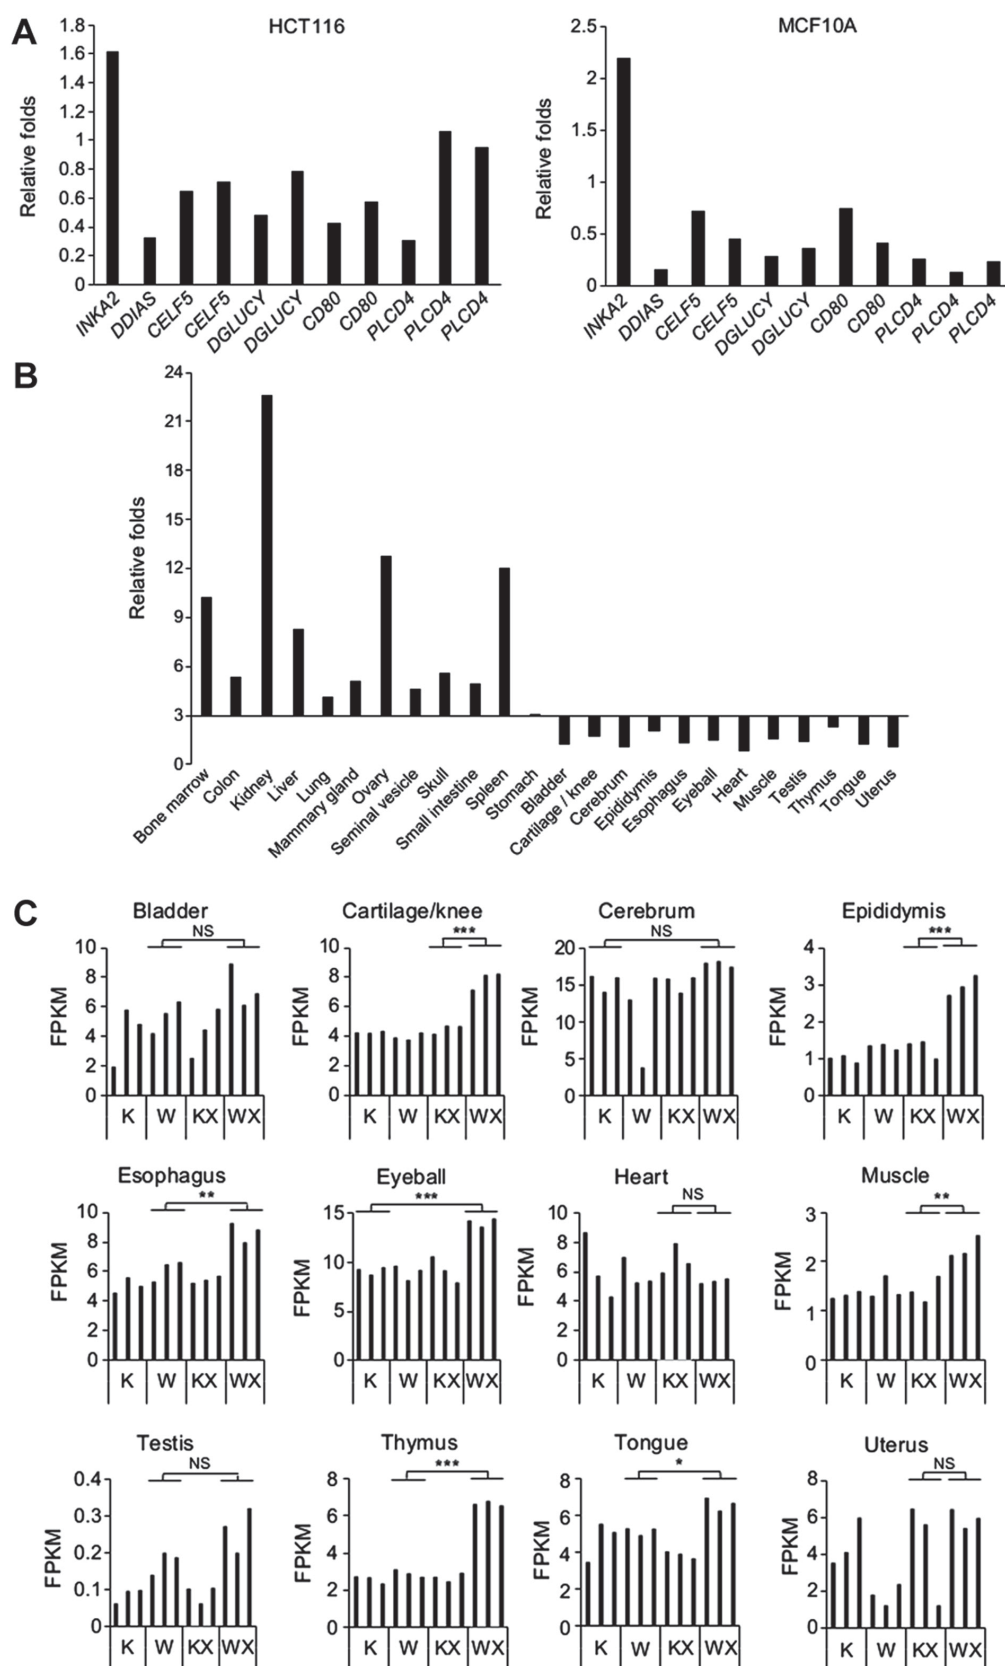

Figure S3. *INKA2* isoform 2 exhibits a low expression. Relative mRNA expression of (A) both isoform 1 and isoform 2 of *INKA2* or (B) isoform 2 only in U2OS cells normalised to GAPDH. The expression of the untreated sample (siRNA-, ADR-) in isoform 2 is considered 1. Cells were treated with or without an siRNA targeting either EGFP or p53 and treated with or without 2 h of 2  $\mu$ g/ml ADR. Error bars are the means  $\pm$  SD, n=2. *INKA2*, inka box actin regulator.

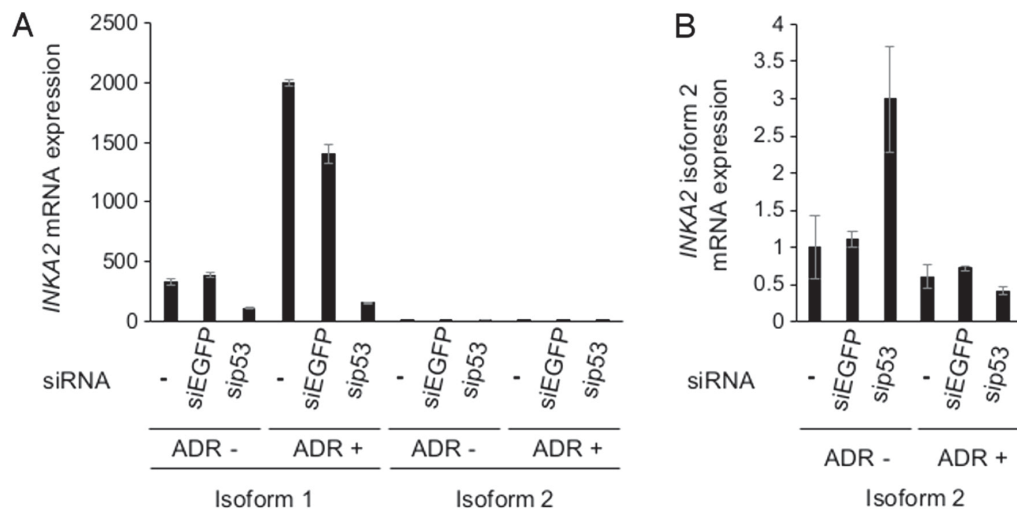

Figure S4. University of California Santa Cruz, California, United States (UCSC) Genome Browser view of TP53 or Trp53 ChIP-seq peaks obtained from (A) the ReMap 2018 database and (B) the ChIPBase database. The *INKA2* (*FAM212B*)/*Inka2* (*Fam212b*) gene is shown beneath the peaks, followed by promoter regions. (A) Human data are integrated with ENCODE data showing H3K4Me1, H3K4Me3 and H3K27Ac histone modification marks from 7 cell types. CpG island tracking information from UCSC is added at the bottom for both species. *INKA2*, inka box actin regulator.

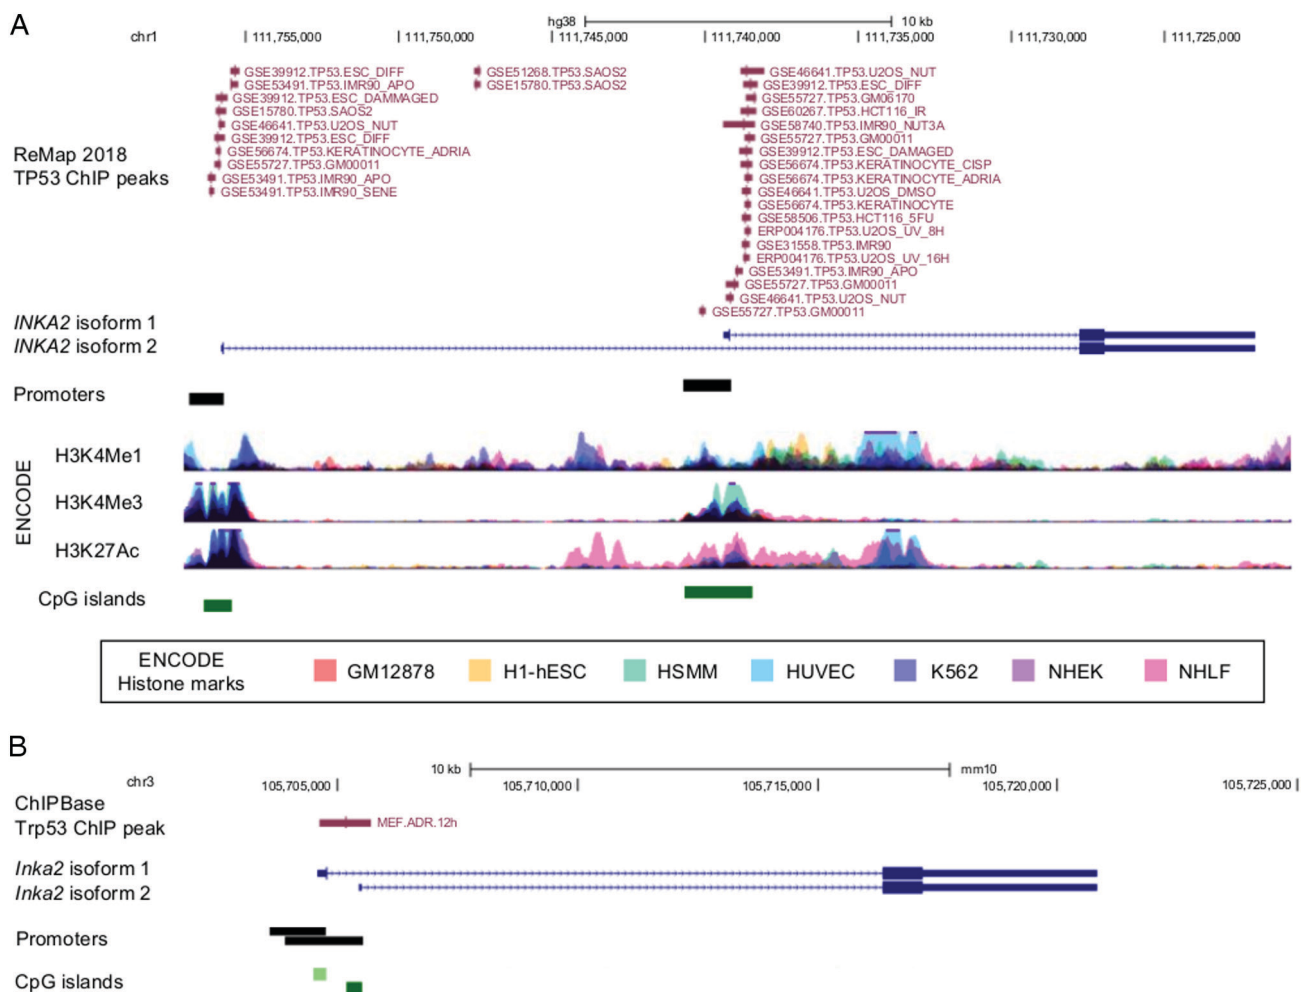



**Table SI. Oligonucleotide sequences and primers.**

| <b>siRNA oligonucleotides</b> | <b>Sense</b>           | <b>Antisense</b>       |
|-------------------------------|------------------------|------------------------|
| siEGFP                        | GCAGCACGACUUCUUCAAGT   | CUUGAAGAAGUCGUGCUGC    |
| sip53                         | GACUCCAGUGGUAUAUCUACTT | GUAGAUUACCACUGGAGUCTT  |
| siINKA2-1                     | GCACUCACCCUCAGGAUUUTT  | AAAUCCUGAGGGUGAGUGCTT  |
| siINKA2-2                     | GGGUGAUGGCUUACAGGAUTT  | AUCCUGUAAGCCAUCACCCTT  |
| <b>Primers</b>                | <b>Forward</b>         | <b>Reverse</b>         |
| INKA2 isoform1<br>(RT-qPCR)   | CTATCTCCGTCGCCTCAAAC   | TCATCTGATCCTGTAAGCCATC |
| INKA2 isoform2<br>(RT-qPCR)   | GGAGAGGAAAGATGAGGCAAC  | TCATCTGATCCTGTAAGCCATC |
| GAPDH ( RT-<br>qPCR)          | ACCATGGGGAAGGTGAAG     | AATGAAGGGGTCATTGATGG   |

|                       |                                  |                                 |
|-----------------------|----------------------------------|---------------------------------|
| INKA2 human p53<br>BS | AAAGATACTCTGCGGGGGCAGGCTT        | AAAAAGCTTCAAGCCCAGACCTGACATCT   |
| INKA2 mouse p53<br>BS | AAAGATACTCTGCGGGGGCAGGCTT        | AAAAAGCTTCCTCCTCCCCGTCATTA      |
| INKA2 expressing      | AAAGAATTCTCCATTATGACGATGGAGAGCAG | AAACTCGAGTCAGACCCAAACAGCTGTGTTA |
| PAK4 expressing       | AAAGAATTCTCCATTATGTTGGGAAGAGGAAG | AAACTCGAGTCTGGTGCGGTTCTGGC      |

INKA2, inka box actin regulator; PAK4, p21 (RAC1) activated kinase.

**Table SII. Primary antibodies used for immunoblotting and immunocytochemistry.**

| <b>Target protein</b> | <b>Animal source, type</b>               | <b>Cat. no.</b> | <b>Use</b> | <b>Working dilution</b> | <b>Vendor</b>                                       |
|-----------------------|------------------------------------------|-----------------|------------|-------------------------|-----------------------------------------------------|
| INKA2/FAM212B         | Rabbit, polyclonal                       | HPA027809       | IB, ICC    | 1:100, 1:50             | Atlas Antibodies, Stockholm, Sweden                 |
| p53                   | Mouse, monoclonal                        | OP03            | IB         | 1:1,000                 | Calbiochem, La Jolla, CA, USA                       |
| p21                   | Mouse, monoclonal                        | OP64            | IB         | 1:500                   | Calbiochem, La Jolla, CA, USA                       |
| HA                    | Rat, monoclonal                          | 11867423001     | IB         | 1:2,000                 | Roche Applied Science, Basel, Switzerland           |
| FLAG                  | Rabbit, polyclonal                       | F7425           | IB         | 1:400                   | Sigma-Aldrich, St. Louis, MO, USA                   |
| PAK4                  | Rabbit, polyclonal                       | #3242           | IB         | 1:1,000                 | Cell Signaling Technology, Danvers, MA, USA         |
| $\beta$ -catenin      | Rabbit, monoclonal                       | sc-7963         | IB, ICC    | 1:200, 1:50             | Santa Cruz Biotechnology, Inc., Santa Cruz, CA, USA |
| $\beta$ -actin        | Mouse, monoclonal                        | A1978           | IB         | 1:5,000                 | Sigma-Aldrich, St. Louis, MO, USA                   |
| Anti-rabbit IgG-HRP   | Goat, horseradish peroxidase conjugated  | sc-2004         | IB         | 1:50,000                | Santa Cruz Biotechnology, Inc., Santa Cruz, CA, USA |
| Anti-rabbit IgG-HRP   | Mouse, horseradish peroxidase conjugated | sc-2357         | IB         | 1:50,000                | Santa Cruz Biotechnology, Inc., Santa Cruz, CA, USA |
| Anti-mouse IgG-       | Goat, horseradish                        | sc-2005         | IB         | 1:50,000                | Santa Cruz Biotechnology, Inc.,                     |



|                  |                                            |         |    |          |                                                        |
|------------------|--------------------------------------------|---------|----|----------|--------------------------------------------------------|
| HRP              | peroxidase conjugated                      |         |    |          | Santa Cruz, CA, USA                                    |
| Anti-rat IgG-HRP | Goat, horseradish<br>peroxidase conjugated | sc-2006 | IB | 1:50,000 | Santa Cruz Biotechnology, Inc.,<br>Santa Cruz, CA, USA |

**Table SIII. Binding scores obtained from JASPAR database.**

| <b>Gene</b>                     | <b>Predicted binding site</b> | <b>Score</b> |
|---------------------------------|-------------------------------|--------------|
| <i>INKA2</i>                    | TGTCTGCCTGGGCTTGTC            | 9.21         |
| <i>Inka2</i>                    | TGTCTGCCCGGGCTTGTC            | 10.85        |
| <i>p21</i><br>( <i>CDKN1A</i> ) | AACATGTCCCAACATGTT            | 22.15        |
| <i>p21 (Cdkn1a)</i>             | AACATGTCTTGACATGTT            | 23.33        |

**Table SIV. TCGA samples.**

| <b>Cancer type</b> | <b>Control samples</b> | <b>Tumour samples</b> | <b>Tumour <i>p53</i> wild-type samples</b> | <b>Tumour <i>p53</i> mutant samples</b> |
|--------------------|------------------------|-----------------------|--------------------------------------------|-----------------------------------------|
| BLCA               | 19                     | 408                   | 344                                        | 64                                      |
| BRCA               | 112                    | 1093                  | 795                                        | 298                                     |
| CESC               | 3                      | 304                   | 295                                        | 9                                       |
| CHOL               | 9                      | 35                    | 30                                         | 5                                       |
| COAD/READ          | 51                     | 379                   | 375                                        | 4                                       |
| GBM/LGG            | 0                      | 669                   | 478                                        | 191                                     |
| HNSC               | 44                     | 520                   | 306                                        | 214                                     |
| KIPAN              | 129                    | 889                   | 857                                        | 32                                      |
| LAML               | 0                      | 173                   | 161                                        | 12                                      |
| LIHC               | 50                     | 371                   | 311                                        | 60                                      |
| LUAD               | 59                     | 515                   | 429                                        | 86                                      |
| LUSC               | 51                     | 501                   | 360                                        | 141                                     |
| OV                 | 3                      | 541                   | 282                                        | 259                                     |
| PAAD               | 4                      | 178                   | 124                                        | 54                                      |
| PCPG               | 3                      | 179                   | 178                                        | 1                                       |
| PRAD               | 52                     | 497                   | 473                                        | 24                                      |
| SKCM               | 1                      | 103                   | 97                                         | 6                                       |
| STAD               | 33                     | 238                   | 164                                        | 74                                      |
| THCA               | 59                     | 501                   | 498                                        | 3                                       |

|      |    |     |     |    |
|------|----|-----|-----|----|
| UCEC | 11 | 370 | 302 | 68 |
|------|----|-----|-----|----|

BLCA, bladder urothelial carcinoma; BRCA, breast invasive carcinoma; CESC, cervical and endocervical cancers; CHOL, cholangiocarcinoma; COAD/READ, colorectal adenocarcinoma; GBM/LGG, glioma; HNSC, head and neck squamous cell carcinoma; KIPAN, pan-kidney cohort; LAML, acute myeloid leukaemia; LIHC, liver hepatocellular carcinoma; LUAD, lung adenocarcinoma; LUSC, lung squamous cell carcinoma; OV, ovarian serous cystadenocarcinoma; PAAD, pancreatic adenocarcinoma; PCPG, pheochromocytoma and paraganglioma; PRAD, prostate adenocarcinoma; STAD, stomach adenocarcinoma; THCA, thyroid carcinoma; UCEC, uterine corpus endometrial carcinoma.

**Table SV. Median mRNA expression in 24 mouse tissues of the 22 candidate genes obtained from mouse transcriptome screening.**

| Organ  | Group | <i>Fam212b</i> | <i>4632434I11Rik</i> | <i>Celf5</i> | <i>9030617O03Rik</i> | <i>Cd80</i> | <i>Sesn2</i> | <i>Zfp365</i> | <i>1700007K13Rik</i> |
|--------|-------|----------------|----------------------|--------------|----------------------|-------------|--------------|---------------|----------------------|
| Thymus | K     | 2.67           | 3.30                 | 0.37         | 1.66                 | 3.59        | 4.09         | 0.47          | 0.49                 |
|        | W     | 2.88           | 3.75                 | 0.34         | 2.90                 | 3.25        | 4.09         | 0.72          | 0.28                 |
|        | KX    | 2.69           | 3.34                 | 0.45         | 1.98                 | 3.54        | 5.16         | 0.76          | 0.69                 |
|        | WX    | 6.64           | 4.84                 | 1.06         | 19.55                | 17.69       | 23.50        | 3.43          | 7.52                 |
| Heart  | K     | 5.73           | 0.11                 | 0.01         | 13.08                | 0.20        | 1.02         | 0.17          | 0.00                 |
|        | W     | 5.38           | 0.07                 | 0.06         | 15.95                | 0.26        | 1.06         | 0.28          | 0.00                 |
|        | KX    | 6.55           | 0.15                 | 0.04         | 16.57                | 0.32        | 0.80         | 0.23          | 0.00                 |
|        | WX    | 5.36           | 0.82                 | 0.74         | 24.74                | 1.19        | 4.65         | 1.58          | 0.30                 |
| Lung   | K     | 3.73           | 0.41                 | 0.09         | 2.84                 | 0.96        | 10.18        | 3.29          | 11.64                |
|        | W     | 4.57           | 0.38                 | 0.09         | 3.95                 | 0.74        | 8.44         | 4.38          | 11.31                |
|        | KX    | 3.69           | 0.36                 | 0.07         | 2.92                 | 0.76        | 8.38         | 3.76          | 14.39                |
|        | WX    | 18.88          | 2.56                 | 2.32         | 17.20                | 1.41        | 24.65        | 11.12         | 20.37                |
| Kidney | K     | 0.09           | 0.14                 | 0.02         | 23.89                | 0.02        | 10.81        | 0.03          | 0.34                 |
|        | W     | 0.11           | 0.21                 | 0.01         | 47.41                | 0.02        | 8.48         | 0.04          | 0.30                 |
|        | KX    | 0.11           | 0.14                 | 0.00         | 29.79                | 0.00        | 8.26         | 0.01          | 0.33                 |
|        | WX    | 2.49           | 1.35                 | 0.15         | 86.53                | 0.05        | 13.93        | 0.37          | 3.21                 |
| Spleen | K     | 0.45           | 3.15                 | 0.02         | 3.15                 | 4.25        | 5.84         | 0.31          | 0.00                 |
|        | W     | 0.81           | 1.62                 | 0.08         | 5.90                 | 4.91        | 6.46         | 0.46          | 0.00                 |

|  |    |      |      |      |       |       |       |      |      |
|--|----|------|------|------|-------|-------|-------|------|------|
|  | KX | 0.43 | 1.72 | 0.05 | 3.78  | 5.37  | 5.20  | 0.48 | 0.00 |
|  | WX | 9.64 | 4.44 | 1.32 | 19.30 | 21.72 | 26.69 | 2.02 | 0.84 |

| Organ  | Group | <i>Bbc3</i> | <i>Psrc1</i> | <i>Ccng1</i> | <i>Phlda3</i> | <i>Gdf15</i> | <i>Cdkn1a</i> | <i>Eda2r</i> | <i>A930001C03Rik</i> | <i>Gm16197</i> | <i>Ces2e</i> |
|--------|-------|-------------|--------------|--------------|---------------|--------------|---------------|--------------|----------------------|----------------|--------------|
| Thymus | K     | 4.98        | 5.87         | 22.62        | 5.98          | 0.39         | 4.47          | 0.05         | 0.12                 | 0.06           | 0.76         |
|        | W     | 6.65        | 7.47         | 29.37        | 8.76          | 0.63         | 7.42          | 0.17         | 0.10                 | 0.10           | 0.79         |
|        | KX    | 8.77        | 9.33         | 25.01        | 9.28          | 1.79         | 6.96          | 0.04         | 0.06                 | 0.34           | 0.73         |
|        | WX    | 22.45       | 22.77        | 128.04       | 122.80        | 27.75        | 271.52        | 2.98         | 1.80                 | 0.59           | 6.17         |
| Heart  | K     | 0.78        | 0.17         | 153.75       | 3.74          | 0.30         | 2.82          | 0.48         | 0.00                 | 0.03           | 0.44         |
|        | W     | 0.77        | 0.23         | 164.90       | 5.93          | 0.39         | 7.82          | 0.73         | 0.04                 | 0.06           | 0.62         |
|        | KX    | 0.73        | 0.20         | 146.51       | 3.48          | 0.46         | 9.79          | 0.18         | 0.00                 | 0.01           | 0.34         |
|        | WX    | 2.43        | 0.63         | 202.67       | 19.38         | 3.78         | 59.67         | 4.36         | 0.09                 | 0.19           | 5.10         |
| Lung   | K     | 4.79        | 0.23         | 20.14        | 14.23         | 1.01         | 10.76         | 0.15         | 0.07                 | 0.05           | 1.58         |
|        | W     | 4.86        | 0.88         | 26.52        | 21.26         | 1.32         | 24.53         | 0.69         | 0.19                 | 0.17           | 2.88         |
|        | KX    | 4.55        | 0.63         | 19.71        | 15.92         | 0.74         | 26.55         | 0.12         | 0.00                 | 0.04           | 1.62         |
|        | WX    | 14.26       | 5.28         | 113.80       | 96.53         | 32.12        | 351.15        | 13.46        | 1.08                 | 1.17           | 29.26        |
| Kidney | K     | 0.37        | 0.28         | 23.71        | 1.30          | 1.72         | 0.86          | 0.00         | 0.37                 | 0.01           | 4.10         |
|        | W     | 0.58        | 0.21         | 50.25        | 1.43          | 2.71         | 1.70          | 0.12         | 0.63                 | 0.01           | 7.04         |
|        | KX    | 0.51        | 0.20         | 24.20        | 1.47          | 2.00         | 1.74          | 0.00         | 0.45                 | 0.00           | 5.10         |
|        | WX    | 1.54        | 1.18         | 196.52       | 18.75         | 17.57        | 37.76         | 1.44         | 1.59                 | 0.18           | 21.12        |
| Spleen | K     | 4.55        | 3.48         | 19.79        | 2.46          | 0.78         | 2.02          | 0.02         | 0.00                 | 0.03           | 0.18         |

|  |    |       |       |        |       |       |        |      |      |      |      |
|--|----|-------|-------|--------|-------|-------|--------|------|------|------|------|
|  | W  | 4.54  | 2.47  | 28.58  | 4.39  | 1.31  | 4.43   | 0.21 | 0.04 | 0.11 | 0.18 |
|  | KX | 3.29  | 3.20  | 23.13  | 2.89  | 0.83  | 2.91   | 0.02 | 0.00 | 0.00 | 0.21 |
|  | WX | 17.43 | 23.55 | 140.11 | 74.08 | 27.38 | 209.59 | 6.44 | 0.32 | 1.40 | 5.05 |

| Organ  | Group | <i>D630023F18Rik</i> | <i>Lif</i> | <i>Mgmt</i> | <i>Plcd4</i> |
|--------|-------|----------------------|------------|-------------|--------------|
| Thymus | K     | 0.11                 | 0.23       | 4.73        | 0.08         |
|        | W     | 0.27                 | 0.28       | 4.59        | 0.23         |
|        | KX    | 0.11                 | 0.28       | 4.01        | 0.24         |
|        | WX    | 4.15                 | 1.96       | 18.89       | 1.67         |
| Heart  | K     | 0.00                 | 0.08       | 4.61        | 0.03         |
|        | W     | 0.00                 | 0.05       | 5.66        | 0.04         |
|        | KX    | 0.00                 | 0.08       | 4.88        | 0.01         |
|        | WX    | 0.03                 | 0.22       | 7.22        | 0.03         |
| Lung   | K     | 0.00                 | 0.73       | 2.04        | 0.18         |
|        | W     | 0.00                 | 0.88       | 2.89        | 0.18         |
|        | KX    | 0.00                 | 0.62       | 1.77        | 0.50         |
|        | WX    | 0.05                 | 2.86       | 9.26        | 1.10         |
| Kidney | K     | 11.57                | 0.05       | 3.13        | 0.45         |
|        | W     | 17.14                | 0.09       | 5.96        | 0.51         |
|        | KX    | 16.35                | 0.04       | 2.58        | 0.41         |
|        | WX    | 24.10                | 0.20       | 14.17       | 3.86         |

|        |    |      |      |       |      |
|--------|----|------|------|-------|------|
| Spleen | K  | 0.01 | 0.28 | 3.39  | 0.04 |
|        | W  | 0.00 | 0.37 | 4.22  | 0.04 |
|        | KX | 0.00 | 0.27 | 2.77  | 0.03 |
|        | WX | 1.31 | 1.47 | 22.12 | 0.05 |

| Organ     | Group | <i>Fam212b</i> | <i>4632434I11Rik</i> | <i>Celf5</i> | <i>9030617O03Rik</i> | <i>Cd80</i> | <i>Sesn2</i> | <i>Zfp365</i> | <i>1700007K13Rik</i> |
|-----------|-------|----------------|----------------------|--------------|----------------------|-------------|--------------|---------------|----------------------|
| Liver     | K     | 0.02           | 0.09                 | 0.00         | 8.57                 | 0.18        | 2.17         | 0.00          | 0.00                 |
|           | W     | 0.04           | 0.10                 | 0.00         | 10.94                | 0.12        | 1.72         | 0.01          | 0.00                 |
|           | KX    | 0.03           | 0.09                 | 0.02         | 9.20                 | 0.11        | 1.86         | 0.01          | 0.06                 |
|           | WX    | 0.32           | 0.92                 | 0.05         | 19.25                | 0.09        | 4.69         | 0.09          | 0.55                 |
| Bladder   | K     | 4.83           | 0.21                 | 0.05         | 5.70                 | 0.85        | 4.49         | 0.22          | 1.07                 |
|           | W     | 5.57           | 0.36                 | 0.13         | 7.86                 | 0.97        | 7.85         | 0.48          | 1.32                 |
|           | KX    | 4.46           | 0.26                 | 0.08         | 5.92                 | 0.85        | 5.29         | 0.26          | 0.89                 |
|           | WX    | 6.90           | 1.97                 | 0.58         | 16.37                | 2.06        | 12.88        | 1.35          | 3.35                 |
| Esophagus | K     | 5.01           | 0.32                 | 0.41         | 5.94                 | 0.88        | 4.68         | 1.12          | 0.66                 |
|           | W     | 6.48           | 0.36                 | 0.41         | 7.13                 | 0.72        | 4.55         | 1.21          | 0.87                 |
|           | KX    | 5.42           | 0.61                 | 0.38         | 7.17                 | 1.03        | 4.01         | 1.13          | 0.72                 |
|           | WX    | 8.83           | 1.75                 | 1.31         | 12.80                | 3.69        | 8.57         | 2.86          | 3.03                 |
| Stomach   | K     | 1.79           | 0.33                 | 0.31         | 6.22                 | 0.93        | 3.58         | 0.34          | 0.31                 |
|           | W     | 2.09           | 0.52                 | 0.41         | 7.60                 | 0.78        | 3.50         | 0.36          | 0.37                 |
|           | KX    | 2.12           | 0.48                 | 0.52         | 6.54                 | 0.68        | 3.13         | 0.44          | 0.40                 |



|       |    |      |      |      |       |      |       |      |      |
|-------|----|------|------|------|-------|------|-------|------|------|
|       | WX | 6.43 | 2.43 | 0.84 | 22.57 | 2.45 | 8.33  | 1.32 | 2.33 |
| Colon | K  | 1.39 | 0.69 | 2.00 | 5.04  | 0.20 | 3.31  | 0.32 | 0.05 |
|       | W  | 1.44 | 0.88 | 2.25 | 7.31  | 0.21 | 4.10  | 0.61 | 0.10 |
|       | KX | 1.45 | 0.96 | 1.94 | 5.08  | 0.29 | 3.65  | 0.38 | 0.10 |
|       | WX | 7.76 | 4.02 | 1.84 | 29.49 | 0.95 | 14.52 | 1.72 | 4.28 |

| Organ     | Group | <i>Bbc3</i> | <i>Psrc1</i> | <i>Ccng1</i> | <i>Phlda3</i> | <i>Gdf15</i> | <i>Cdkn1a</i> | <i>Eda2r</i> | <i>A930001C03Rik</i> | <i>Gm16197</i> | <i>Ces2e</i> |
|-----------|-------|-------------|--------------|--------------|---------------|--------------|---------------|--------------|----------------------|----------------|--------------|
| Liver     | K     | 0.93        | 0.02         | 5.10         | 0.23          | 3.38         | 0.77          | 0.00         | 0.44                 | 0.00           | 34.05        |
|           | W     | 1.12        | 0.02         | 7.34         | 0.44          | 2.32         | 0.67          | 0.05         | 0.30                 | 0.00           | 104.16       |
|           | KX    | 1.15        | 0.02         | 5.60         | 0.37          | 2.79         | 0.42          | 0.01         | 0.22                 | 0.00           | 41.31        |
|           | WX    | 1.49        | 0.27         | 26.97        | 4.92          | 16.37        | 33.43         | 1.51         | 1.12                 | 0.08           | 109.47       |
| Bladder   | K     | 1.27        | 0.24         | 23.09        | 34.29         | 0.70         | 7.89          | 0.24         | 0.21                 | 0.03           | 2.55         |
|           | W     | 1.57        | 1.06         | 41.92        | 40.57         | 0.60         | 23.36         | 0.85         | 0.36                 | 0.25           | 2.95         |
|           | KX    | 1.17        | 0.36         | 24.24        | 35.45         | 0.42         | 14.36         | 0.13         | 0.18                 | 0.01           | 2.10         |
|           | WX    | 3.10        | 2.41         | 110.04       | 71.51         | 6.85         | 146.13        | 4.05         | 1.61                 | 0.42           | 8.33         |
| Esophagus | K     | 0.88        | 1.95         | 91.68        | 75.35         | 0.17         | 155.63        | 1.96         | 0.25                 | 0.06           | 7.19         |
|           | W     | 0.91        | 2.02         | 99.88        | 72.67         | 0.14         | 151.91        | 2.06         | 0.26                 | 0.10           | 6.51         |
|           | KX    | 0.88        | 2.43         | 94.42        | 66.31         | 0.04         | 141.44        | 1.47         | 0.21                 | 0.08           | 7.45         |
|           | WX    | 2.47        | 4.92         | 138.43       | 101.14        | 0.94         | 247.03        | 4.70         | 0.74                 | 0.23           | 14.62        |
| Stomach   | K     | 0.76        | 0.58         | 25.79        | 10.82         | 0.20         | 69.86         | 0.13         | 0.24                 | 0.05           | 3.66         |
|           | W     | 0.82        | 0.78         | 29.88        | 10.41         | 0.24         | 74.09         | 0.24         | 0.45                 | 0.07           | 3.76         |

|       |    |      |       |        |       |       |        |       |      |      |        |
|-------|----|------|-------|--------|-------|-------|--------|-------|------|------|--------|
|       | KX | 0.68 | 0.44  | 26.80  | 11.87 | 0.25  | 70.72  | 0.10  | 0.44 | 0.04 | 3.35   |
|       | WX | 3.04 | 3.99  | 135.56 | 45.19 | 3.56  | 177.96 | 2.38  | 1.00 | 0.39 | 9.57   |
| Colon | K  | 1.33 | 1.02  | 18.93  | 2.97  | 0.66  | 103.34 | 0.04  | 0.13 | 0.03 | 79.54  |
|       | W  | 1.41 | 1.29  | 30.18  | 4.83  | 1.49  | 94.79  | 0.92  | 0.24 | 0.05 | 83.70  |
|       | KX | 1.56 | 0.63  | 19.17  | 3.53  | 0.88  | 88.21  | 0.06  | 0.32 | 0.05 | 70.92  |
|       | WX | 5.50 | 11.55 | 176.66 | 49.93 | 20.39 | 209.28 | 11.82 | 1.76 | 0.27 | 200.76 |

| Organ     | Group | <i>D630023F18Rik</i> | <i>Lif</i> | <i>Mgmt</i> | <i>Plcd4</i> |
|-----------|-------|----------------------|------------|-------------|--------------|
| Liver     | K     | 0.02                 | 0.01       | 13.18       | 0.00         |
|           | W     | 0.00                 | 0.00       | 19.86       | 0.00         |
|           | KX    | 0.00                 | 0.00       | 16.87       | 0.00         |
|           | WX    | 0.03                 | 0.10       | 32.09       | 0.00         |
| Bladder   | K     | 0.77                 | 3.11       | 5.13        | 0.04         |
|           | W     | 1.34                 | 1.33       | 7.20        | 0.24         |
|           | KX    | 0.73                 | 1.62       | 4.77        | 0.13         |
|           | WX    | 1.23                 | 3.24       | 21.00       | 0.95         |
| Esophagus | K     | 0.16                 | 0.23       | 5.15        | 2.26         |
|           | W     | 0.14                 | 0.22       | 5.96        | 2.67         |
|           | KX    | 0.08                 | 0.26       | 4.73        | 1.97         |
|           | WX    | 0.79                 | 0.94       | 17.09       | 3.51         |
| Stomach   | K     | 0.09                 | 0.26       | 11.78       | 0.05         |

|       |    |      |      |       |      |
|-------|----|------|------|-------|------|
|       | W  | 0.05 | 0.29 | 10.76 | 0.06 |
|       | KX | 0.11 | 0.30 | 9.79  | 0.07 |
|       | WX | 0.12 | 0.99 | 23.90 | 0.86 |
| Colon | K  | 0.06 | 0.85 | 1.95  | 0.28 |
|       | W  | 0.05 | 0.81 | 3.87  | 0.13 |
|       | KX | 0.07 | 1.05 | 2.48  | 0.12 |
|       | WX | 0.07 | 4.07 | 22.74 | 2.60 |

| Organ           | Group | <i>Fam212b</i> | <i>4632434I11Rik</i> | <i>Celf5</i> | <i>9030617O03Rik</i> | <i>Cd80</i> | <i>Sesn2</i> | <i>Zfp365</i> | <i>1700007K13Rik</i> |
|-----------------|-------|----------------|----------------------|--------------|----------------------|-------------|--------------|---------------|----------------------|
| Small intestine | K     | 0.61           | 1.20                 | 1.15         | 17.65                | 0.49        | 2.45         | 0.10          | 0.05                 |
|                 | W     | 0.62           | 1.16                 | 1.23         | 18.20                | 0.60        | 2.26         | 0.11          | 0.05                 |
|                 | KX    | 0.68           | 1.45                 | 0.78         | 14.77                | 0.40        | 2.40         | 0.12          | 0.00                 |
|                 | WX    | 3.31           | 4.21                 | 0.72         | 29.12                | 1.82        | 9.04         | 0.98          | 1.77                 |
| Testis          | K     | 0.10           | 25.43                | 8.97         | 0.30                 | 0.07        | 6.79         | 0.02          | 35.63                |
|                 | W     | 0.19           | 24.86                | 9.65         | 0.29                 | 0.08        | 6.43         | 0.02          | 35.42                |
|                 | KX    | 0.10           | 25.65                | 8.07         | 0.38                 | 0.05        | 7.51         | 0.03          | 41.84                |
|                 | WX    | 0.27           | 23.68                | 9.57         | 1.66                 | 0.07        | 8.62         | 0.15          | 37.13                |
| Epididymis      | K     | 1.02           | 0.40                 | 0.06         | 1.94                 | 0.35        | 9.06         | 0.59          | 0.89                 |
|                 | W     | 1.35           | 0.73                 | 0.08         | 3.55                 | 0.31        | 9.59         | 0.79          | 0.59                 |
|                 | KX    | 1.41           | 0.58                 | 0.10         | 2.19                 | 0.41        | 7.99         | 0.99          | 0.73                 |
|                 | WX    | 2.94           | 1.89                 | 0.51         | 10.81                | 1.10        | 15.42        | 1.53          | 2.92                 |

|                 |    |      |      |      |       |      |       |      |      |
|-----------------|----|------|------|------|-------|------|-------|------|------|
| Seminal vesicle | K  | 1.54 | 0.19 | 0.04 | 2.98  | 0.15 | 5.64  | 0.24 | 0.07 |
|                 | W  | 1.50 | 0.12 | 0.10 | 3.50  | 0.12 | 3.15  | 0.14 | 0.08 |
|                 | KX | 1.62 | 0.28 | 0.02 | 2.62  | 0.16 | 7.78  | 0.10 | 0.07 |
|                 | WX | 7.44 | 2.75 | 0.76 | 23.19 | 0.57 | 14.65 | 0.92 | 3.26 |
| Muscle          | K  | 1.32 | 0.03 | 0.04 | 6.00  | 0.12 | 0.82  | 0.13 | 0.10 |
|                 | W  | 1.33 | 0.02 | 0.02 | 4.54  | 0.14 | 0.84  | 0.12 | 0.00 |
|                 | KX | 1.38 | 0.02 | 0.05 | 6.55  | 0.08 | 0.91  | 0.13 | 0.06 |
|                 | WX | 2.17 | 0.85 | 0.34 | 13.74 | 0.47 | 2.83  | 0.65 | 0.25 |

| Organ           | Group | <i>Bbc3</i> | <i>Psrl1</i> | <i>Ccng1</i> | <i>Phlda3</i> | <i>Gdf15</i> | <i>Cdkn1a</i> | <i>Eda2r</i> | <i>A930001C03Rik</i> | <i>Gm16197</i> | <i>Ces2e</i> |
|-----------------|-------|-------------|--------------|--------------|---------------|--------------|---------------|--------------|----------------------|----------------|--------------|
| Small intestine | K     | 0.57        | 0.73         | 10.74        | 1.28          | 0.22         | 124.78        | 0.02         | 0.45                 | 0.02           | 441.31       |
|                 | W     | 0.68        | 1.12         | 14.91        | 1.84          | 0.29         | 105.79        | 0.19         | 0.68                 | 0.02           | 377.40       |
|                 | KX    | 0.74        | 0.58         | 10.16        | 1.45          | 0.52         | 121.67        | 0.02         | 0.47                 | 0.05           | 415.74       |
|                 | WX    | 3.28        | 14.28        | 85.91        | 22.45         | 5.68         | 182.73        | 3.96         | 1.33                 | 0.16           | 500.05       |
| Testis          | K     | 0.86        | 0.10         | 1.41         | 0.61          | 0.18         | 3.23          | 0.03         | 0.26                 | 0.14           | 0.13         |
|                 | W     | 1.00        | 0.17         | 1.88         | 0.84          | 0.24         | 3.54          | 0.07         | 0.36                 | 0.21           | 0.11         |
|                 | KX    | 0.82        | 0.12         | 1.51         | 0.70          | 0.24         | 3.47          | 0.03         | 0.27                 | 0.17           | 0.06         |
|                 | WX    | 1.38        | 0.25         | 5.18         | 2.36          | 0.39         | 6.48          | 0.55         | 0.19                 | 0.41           | 0.27         |
| Epididymis      | K     | 0.64        | 0.23         | 20.31        | 15.92         | 1.40         | 17.51         | 0.35         | 0.38                 | 0.02           | 2.45         |
|                 | W     | 0.65        | 0.50         | 35.66        | 19.25         | 2.40         | 22.35         | 0.40         | 0.75                 | 0.05           | 2.83         |
|                 | KX    | 0.66        | 0.34         | 23.94        | 16.31         | 1.39         | 16.36         | 0.37         | 0.22                 | 0.00           | 2.64         |

|                 |    |      |      |        |        |       |       |       |      |      |       |
|-----------------|----|------|------|--------|--------|-------|-------|-------|------|------|-------|
|                 | WX | 2.43 | 1.76 | 82.31  | 31.38  | 5.09  | 58.62 | 2.68  | 1.97 | 0.69 | 7.19  |
| Seminal vesicle | K  | 1.58 | 0.94 | 17.87  | 7.98   | 0.33  | 0.40  | 0.28  | 0.00 | 0.00 | 1.23  |
|                 | W  | 2.04 | 0.88 | 21.67  | 7.29   | 0.33  | 1.06  | 0.39  | 0.00 | 0.00 | 1.29  |
|                 | KX | 1.93 | 0.77 | 16.76  | 7.65   | 0.43  | 0.53  | 0.18  | 0.06 | 0.00 | 1.73  |
|                 | WX | 6.75 | 7.71 | 122.09 | 36.64  | 15.19 | 39.56 | 10.85 | 0.62 | 0.20 | 10.79 |
| Muscle          | K  | 0.35 | 0.06 | 232.46 | 101.62 | 0.03  | 8.02  | 1.85  | 0.00 | 0.09 | 0.02  |
|                 | W  | 0.35 | 0.10 | 233.56 | 92.77  | 0.03  | 4.29  | 1.52  | 0.00 | 0.08 | 0.05  |
|                 | KX | 0.39 | 0.04 | 239.39 | 103.22 | 0.00  | 10.32 | 1.44  | 0.00 | 0.08 | 0.03  |
|                 | WX | 1.21 | 0.44 | 342.65 | 125.37 | 2.15  | 86.37 | 6.70  | 0.09 | 0.25 | 0.36  |

| Organ           | Group | <i>D630023F18Rik</i> | <i>Lif</i> | <i>Mgmt</i> | <i>Plcd4</i> |
|-----------------|-------|----------------------|------------|-------------|--------------|
| Small intestine | K     | 0.03                 | 1.65       | 0.98        | 0.03         |
|                 | W     | 0.10                 | 1.51       | 1.31        | 0.05         |
|                 | KX    | 0.07                 | 1.77       | 0.89        | 0.01         |
|                 | WX    | 0.12                 | 2.91       | 7.97        | 0.21         |
| Testis          | K     | 0.00                 | 0.08       | 1.50        | 55.49        |
|                 | W     | 0.00                 | 0.09       | 1.57        | 56.44        |
|                 | KX    | 0.01                 | 0.07       | 1.22        | 56.27        |
|                 | WX    | 0.02                 | 0.10       | 3.09        | 59.66        |
| Epididymis      | K     | 0.00                 | 0.71       | 2.71        | 0.72         |
|                 | W     | 0.03                 | 0.52       | 3.68        | 1.93         |

|                 |    |      |      |       |       |
|-----------------|----|------|------|-------|-------|
|                 | KX | 0.00 | 0.68 | 2.56  | 1.09  |
|                 | WX | 0.19 | 1.02 | 16.86 | 2.01  |
| Seminal vesicle | K  | 0.00 | 0.10 | 0.62  | 0.02  |
|                 | W  | 0.00 | 0.09 | 0.62  | 0.04  |
|                 | KX | 0.00 | 0.07 | 0.53  | 0.04  |
|                 | WX | 0.28 | 0.72 | 7.09  | 0.74  |
| Muscle          | K  | 0.00 | 0.09 | 4.41  | 26.21 |
|                 | W  | 0.00 | 0.14 | 4.62  | 52.89 |
|                 | KX | 0.00 | 0.11 | 4.99  | 53.06 |
|                 | WX | 0.00 | 0.18 | 8.98  | 51.70 |

| Organ       | Group | <i>Fam212b</i> | <i>4632434I11Rik</i> | <i>Celf5</i> | <i>9030617O03Rik</i> | <i>Cd80</i> | <i>Sesn2</i> | <i>Zfp365</i> | <i>1700007K13Rik</i> |
|-------------|-------|----------------|----------------------|--------------|----------------------|-------------|--------------|---------------|----------------------|
| Bone marrow | K     | 0.10           | 5.35                 | 0.01         | 4.07                 | 1.63        | 5.88         | 0.03          | 0.00                 |
|             | W     | 0.20           | 5.78                 | 0.01         | 4.79                 | 1.85        | 6.34         | 0.04          | 0.00                 |
|             | KX    | 0.15           | 4.49                 | 0.04         | 5.54                 | 2.95        | 7.00         | 0.08          | 0.00                 |
|             | WX    | 2.07           | 7.85                 | 0.11         | 17.95                | 13.34       | 20.61        | 1.25          | 0.47                 |
| Tongue      | K     | 5.10           | 0.28                 | 0.15         | 8.55                 | 0.23        | 1.07         | 0.66          | 0.83                 |
|             | W     | 5.29           | 0.37                 | 0.15         | 9.13                 | 0.21        | 1.33         | 0.81          | 1.06                 |
|             | KX    | 3.92           | 0.50                 | 0.17         | 10.57                | 0.28        | 1.37         | 0.74          | 0.72                 |
|             | WX    | 6.68           | 1.40                 | 0.95         | 13.45                | 1.15        | 6.07         | 2.27          | 2.26                 |
| Eyeball     | K     | 9.27           | 0.47                 | 6.70         | 1.72                 | 0.16        | 3.54         | 28.55         | 0.79                 |

|          |    |       |      |       |       |      |       |       |      |
|----------|----|-------|------|-------|-------|------|-------|-------|------|
|          | W  | 9.19  | 0.58 | 6.24  | 1.92  | 0.24 | 4.37  | 26.51 | 1.33 |
|          | KX | 9.15  | 0.61 | 6.61  | 1.76  | 0.19 | 4.15  | 28.15 | 1.29 |
|          | WX | 14.22 | 1.40 | 7.26  | 4.37  | 0.17 | 6.77  | 29.06 | 2.10 |
| Cerebrum | K  | 15.97 | 0.06 | 43.32 | 2.94  | 0.12 | 4.33  | 64.34 | 2.34 |
|          | W  | 12.96 | 0.11 | 39.47 | 2.15  | 0.06 | 3.84  | 72.16 | 1.90 |
|          | KX | 15.82 | 0.14 | 35.71 | 2.68  | 0.20 | 3.44  | 67.09 | 1.88 |
|          | WX | 17.94 | 0.44 | 42.69 | 4.32  | 0.37 | 5.68  | 75.26 | 3.87 |
| Uterus   | K  | 4.12  | 0.60 | 0.23  | 3.34  | 0.65 | 2.97  | 0.39  | 0.15 |
|          | W  | 1.81  | 1.87 | 0.14  | 4.72  | 0.60 | 3.42  | 0.35  | 0.26 |
|          | KX | 5.61  | 0.87 | 0.26  | 3.66  | 0.65 | 4.36  | 0.53  | 0.16 |
|          | WX | 5.96  | 3.32 | 3.64  | 24.90 | 2.62 | 20.62 | 2.11  | 6.54 |

| Organ       | Group | <i>Bbc3</i> | <i>Psrl1</i> | <i>Ccng1</i> | <i>Phlda3</i> | <i>Gdf15</i> | <i>Cdkn1a</i> | <i>Eda2r</i> | <i>A930001C03Rik</i> | <i>Gm16197</i> | <i>Ces2e</i> |
|-------------|-------|-------------|--------------|--------------|---------------|--------------|---------------|--------------|----------------------|----------------|--------------|
| Bone marrow | K     | 2.83        | 6.91         | 14.61        | 0.71          | 0.79         | 4.16          | 0.00         | 0.00                 | 0.06           | 0.10         |
|             | W     | 3.23        | 8.32         | 18.86        | 0.74          | 1.22         | 5.12          | 0.03         | 0.00                 | 0.08           | 0.13         |
|             | KX    | 3.31        | 8.28         | 19.12        | 0.90          | 1.73         | 7.42          | 0.00         | 0.00                 | 0.09           | 0.26         |
|             | WX    | 12.03       | 14.02        | 144.99       | 30.18         | 21.98        | 127.02        | 2.19         | 0.16                 | 1.95           | 1.92         |
| Tongue      | K     | 0.88        | 1.07         | 95.42        | 98.91         | 0.29         | 100.53        | 1.62         | 0.16                 | 0.25           | 1.60         |
|             | W     | 0.81        | 1.28         | 92.18        | 100.68        | 0.24         | 97.08         | 1.65         | 0.08                 | 0.25           | 1.48         |
|             | KX    | 0.77        | 1.14         | 93.16        | 101.01        | 0.32         | 82.91         | 1.53         | 0.18                 | 0.17           | 1.08         |
|             | WX    | 2.76        | 5.49         | 128.24       | 125.84        | 1.98         | 193.21        | 5.01         | 0.60                 | 0.22           | 5.76         |

|          |    |       |       |        |       |      |        |       |      |      |      |
|----------|----|-------|-------|--------|-------|------|--------|-------|------|------|------|
| Eyeball  | K  | 1.15  | 0.62  | 36.90  | 8.74  | 0.20 | 8.31   | 0.15  | 0.21 | 0.08 | 0.88 |
|          | W  | 0.98  | 0.72  | 39.16  | 10.65 | 0.29 | 10.30  | 0.11  | 0.09 | 0.11 | 1.27 |
|          | KX | 1.02  | 0.71  | 35.55  | 9.08  | 0.18 | 9.35   | 0.05  | 0.09 | 0.07 | 1.09 |
|          | WX | 1.94  | 1.46  | 74.66  | 21.80 | 2.30 | 37.07  | 1.22  | 0.52 | 0.22 | 3.37 |
| Cerebrum | K  | 2.08  | 2.03  | 7.74   | 13.42 | 0.00 | 8.35   | 0.01  | 0.29 | 0.12 | 0.04 |
|          | W  | 2.24  | 1.83  | 16.23  | 11.71 | 0.03 | 5.87   | 0.10  | 0.34 | 0.14 | 0.05 |
|          | KX | 1.82  | 1.64  | 16.70  | 12.80 | 0.00 | 9.33   | 0.03  | 0.25 | 0.10 | 0.01 |
|          | WX | 2.36  | 3.79  | 43.34  | 24.67 | 0.28 | 43.04  | 2.06  | 0.26 | 0.40 | 0.11 |
| Uterus   | K  | 2.48  | 1.44  | 15.03  | 11.34 | 0.35 | 5.80   | 2.12  | 0.10 | 0.04 | 1.15 |
|          | W  | 1.56  | 2.57  | 25.32  | 15.61 | 0.42 | 14.28  | 0.65  | 0.11 | 0.06 | 1.25 |
|          | KX | 4.51  | 2.37  | 15.96  | 18.84 | 0.27 | 2.31   | 3.84  | 0.10 | 0.05 | 0.77 |
|          | WX | 18.76 | 21.63 | 132.73 | 91.43 | 7.03 | 235.28 | 16.21 | 1.73 | 1.86 | 6.30 |

| Organ       | Group | <i>D630023F18Rik</i> | <i>Lif</i> | <i>Mgmt</i> | <i>Plcd4</i> |
|-------------|-------|----------------------|------------|-------------|--------------|
| Bone marrow | K     | 0.09                 | 0.03       | 6.16        | 0.00         |
|             | W     | 0.04                 | 0.02       | 6.71        | 0.00         |
|             | KX    | 0.11                 | 0.06       | 8.55        | 0.00         |
|             | WX    | 1.53                 | 0.36       | 26.00       | 0.02         |
| Tongue      | K     | 0.05                 | 0.26       | 3.28        | 3.60         |
|             | W     | 0.06                 | 0.17       | 4.26        | 4.64         |
|             | KX    | 0.05                 | 0.18       | 3.42        | 4.58         |



|          |    |      |      |       |      |
|----------|----|------|------|-------|------|
|          | WX | 0.22 | 0.55 | 10.47 | 4.74 |
| Eyeball  | K  | 0.32 | 0.25 | 3.58  | 1.38 |
|          | W  | 0.48 | 0.20 | 3.87  | 1.22 |
|          | KX | 0.51 | 0.25 | 3.09  | 1.21 |
|          | WX | 0.42 | 0.41 | 7.68  | 1.56 |
| Cerebrum | K  | 1.05 | 0.13 | 0.87  | 6.93 |
|          | W  | 1.19 | 0.13 | 1.55  | 6.20 |
|          | KX | 1.10 | 0.09 | 0.65  | 7.02 |
|          | WX | 1.11 | 0.23 | 2.61  | 8.03 |
| Uterus   | K  | 0.02 | 1.51 | 5.28  | 0.09 |
|          | W  | 0.00 | 5.76 | 4.23  | 0.09 |
|          | KX | 0.04 | 1.60 | 5.81  | 0.10 |
|          | WX | 0.13 | 5.13 | 18.75 | 3.33 |

| Organ          | Group | <i>Fam212b</i> | <i>4632434I11Rik</i> | <i>Celf5</i> | <i>9030617O03Rik</i> | <i>Cd80</i> | <i>Sesn2</i> | <i>Zfp365</i> | <i>1700007K13Rik</i> |
|----------------|-------|----------------|----------------------|--------------|----------------------|-------------|--------------|---------------|----------------------|
| Skull/calvaria | K     | 1.22           | 0.80                 | 1.14         | 2.68                 | 0.41        | 3.62         | 1.55          | 0.23                 |
|                | W     | 1.46           | 0.93                 | 1.68         | 3.29                 | 0.51        | 4.21         | 1.91          | 0.29                 |
|                | KX    | 0.53           | 1.23                 | 0.94         | 2.76                 | 0.64        | 3.66         | 1.72          | 0.05                 |
|                | WX    | 8.10           | 2.43                 | 5.47         | 11.29                | 2.00        | 17.52        | 5.47          | 3.76                 |
| Cartilage/knee | K     | 4.24           | 0.81                 | 0.23         | 1.31                 | 0.39        | 2.24         | 1.29          | 0.14                 |
|                | W     | 3.91           | 0.80                 | 0.34         | 1.71                 | 0.47        | 2.84         | 1.24          | 0.14                 |

|               |    |      |      |      |       |      |       |      |       |
|---------------|----|------|------|------|-------|------|-------|------|-------|
|               | KX | 4.68 | 1.02 | 0.32 | 1.52  | 0.40 | 2.38  | 1.36 | 0.14  |
|               | WX | 8.15 | 2.45 | 1.70 | 5.57  | 2.22 | 9.67  | 3.38 | 1.77  |
| Ovary         | K  | 0.42 | 1.72 | 0.06 | 2.57  | 0.32 | 3.48  | 0.29 | 4.58  |
|               | W  | 0.76 | 1.72 | 0.15 | 5.08  | 0.50 | 5.17  | 0.47 | 11.43 |
|               | KX | 0.58 | 2.61 | 0.07 | 2.13  | 0.59 | 4.30  | 0.17 | 5.30  |
|               | WX | 9.69 | 5.90 | 2.22 | 28.98 | 1.62 | 21.97 | 4.01 | 13.52 |
| Mammary gland | K  | 1.10 | 0.32 | 0.11 | 9.84  | 1.70 | 5.05  | 0.38 | 0.11  |
|               | W  | 1.17 | 0.43 | 0.11 | 9.46  | 1.87 | 4.11  | 0.42 | 0.19  |
|               | KX | 1.20 | 0.31 | 0.09 | 10.58 | 1.52 | 5.62  | 0.43 | 0.09  |
|               | WX | 6.06 | 2.31 | 1.75 | 32.54 | 4.89 | 16.19 | 2.30 | 3.85  |

| Organ              | Group | <i>Bbc3</i> | <i>Psrl</i> | <i>Cngl</i> | <i>Phlda3</i> | <i>Gdf15</i> | <i>Cdkn1a</i> | <i>Eda2r</i> | <i>A930001C03Rik</i> | <i>Gm16197</i> | <i>Ces2e</i> |
|--------------------|-------|-------------|-------------|-------------|---------------|--------------|---------------|--------------|----------------------|----------------|--------------|
| Skull<br>/calvaria | K     | 4.87        | 4.77        | 15.05       | 19.29         | 0.49         | 64.30         | 0.22         | 0.24                 | 0.10           | 0.54         |
|                    | W     | 5.52        | 5.53        | 17.13       | 23.24         | 0.25         | 74.00         | 0.25         | 0.27                 | 0.10           | 0.63         |
|                    | KX    | 4.86        | 7.09        | 14.88       | 18.02         | 0.27         | 66.17         | 0.13         | 0.29                 | 0.07           | 0.63         |
|                    | WX    | 16.85       | 29.63       | 75.24       | 90.31         | 3.07         | 343.52        | 5.71         | 0.94                 | 0.51           | 2.25         |
| Cartilage<br>/knee | K     | 3.63        | 4.49        | 28.12       | 18.75         | 0.34         | 45.63         | 0.59         | 0.11                 | 0.16           | 0.21         |
|                    | W     | 3.80        | 4.71        | 28.28       | 18.42         | 0.34         | 57.36         | 0.76         | 0.16                 | 0.21           | 0.29         |
|                    | KX    | 3.02        | 7.90        | 30.50       | 17.33         | 0.19         | 39.31         | 0.49         | 0.22                 | 0.15           | 0.25         |
|                    | WX    | 9.50        | 15.61       | 80.32       | 64.90         | 1.43         | 222.81        | 4.00         | 1.15                 | 0.94           | 1.96         |

|               |    |       |       |        |        |       |        |       |      |      |      |
|---------------|----|-------|-------|--------|--------|-------|--------|-------|------|------|------|
| Ovary         | K  | 2.12  | 9.16  | 11.06  | 12.74  | 1.58  | 3.42   | 0.50  | 0.15 | 0.03 | 2.16 |
|               | W  | 3.55  | 7.41  | 21.39  | 18.85  | 1.68  | 23.22  | 1.96  | 0.33 | 0.18 | 2.03 |
|               | KX | 1.96  | 9.12  | 10.93  | 11.73  | 2.64  | 8.60   | 0.55  | 0.13 | 0.03 | 3.20 |
|               | WX | 18.00 | 34.98 | 117.41 | 93.50  | 17.38 | 306.16 | 16.64 | 1.46 | 1.44 | 8.75 |
| Mammary gland | K  | 6.71  | 1.01  | 22.40  | 88.46  | 0.72  | 6.69   | 0.21  | 0.18 | 0.02 | 1.15 |
|               | W  | 9.16  | 1.49  | 26.89  | 91.55  | 0.92  | 12.21  | 0.35  | 0.11 | 0.09 | 1.80 |
|               | KX | 6.20  | 1.03  | 22.10  | 115.62 | 1.31  | 13.60  | 0.10  | 0.11 | 0.05 | 0.71 |
|               | WX | 15.34 | 22.25 | 101.71 | 177.02 | 19.62 | 211.20 | 6.56  | 1.34 | 1.08 | 7.18 |

| Organ          | Group | <i>D630023F18Rik</i> | <i>Lif</i> | <i>Mgmt</i> | <i>Plcd4</i> |
|----------------|-------|----------------------|------------|-------------|--------------|
| Skull/calvaria | K     | 0.00                 | 2.54       | 6.37        | 0.54         |
|                | W     | 0.01                 | 2.99       | 6.28        | 0.26         |
|                | KX    | 0.00                 | 3.39       | 6.86        | 0.04         |
|                | WX    | 0.33                 | 4.26       | 19.86       | 0.68         |
| Cartilage/knee | K     | 0.01                 | 0.61       | 4.53        | 1.70         |
|                | W     | 0.02                 | 0.68       | 4.88        | 2.10         |
|                | KX    | 0.00                 | 0.60       | 4.88        | 2.31         |
|                | WX    | 0.08                 | 0.79       | 12.34       | 5.12         |
| Ovary          | K     | 9.36                 | 0.23       | 17.05       | 2.88         |
|                | W     | 17.71                | 0.33       | 19.37       | 0.04         |
|                | KX    | 5.98                 | 0.28       | 12.01       | 0.08         |

|               |    |       |      |       |      |
|---------------|----|-------|------|-------|------|
|               | WX | 21.04 | 1.93 | 54.05 | 0.91 |
| Mammary gland | K  | 0.02  | 0.67 | 7.10  | 1.19 |
|               | W  | 0.04  | 0.60 | 7.90  | 0.11 |
|               | KX | 0.01  | 0.60 | 10.09 | 0.08 |
|               | WX | 0.65  | 2.26 | 38.93 | 0.12 |

W, *p53* wild-type; K, *p53* knockout; KX, *p53* knockout irradiated; WX, *p53* wild-type irradiated.

**Table SVI. Genomic locations of p53 ChIP-seq peaks from ReMap 2018 database and *INKA2/FAM212B* binding site and promoter region.**

| Cell type                                   | p53 status | Biological condition | Start position                            | End position                              | Peak length (bp)  | PMID     | GSE ID    |
|---------------------------------------------|------------|----------------------|-------------------------------------------|-------------------------------------------|-------------------|----------|-----------|
| U2OS                                        | Wild-type  | UV                   | 111,738,507<br>111,738,540                | 111,738,718<br>111,738,746                | 211<br>206        | 24289924 | ERP004176 |
| IMR-90                                      | Wild-type  | 5-FU                 | 111,738,530                               | 111,738,787                               | 257               | 22127205 | GSE31558  |
| hESCs                                       | Wild-type  | ADR                  | 111,738,291                               | 111,738,744                               | 214               | 24078252 | GSE39912  |
| U2OS                                        | Wild-type  | ADR, Nutlin-3a       | 111,738,077<br>111,738,473                | 111,738,840<br>111,738,811                | 763<br>338        | 23775793 | GSE46641  |
| GM00011,<br>GM06170                         | Wild-type  | ADR                  | 111,738,308<br>111,738,378                | 111,738,668<br>111,738,701                | 360<br>323        | 25883152 | GSE55727  |
| HFK                                         | Wild-type  | ADR, cisplatin       | 111,738,438<br>111,738,457<br>111,738,493 | 111,738,844<br>111,738,723<br>111,738,711 | 406<br>266<br>218 | 24823795 | GSE56674  |
| HCT 116                                     | Wild-type  | 5-FU                 | 111,738,495                               | 111,738,787                               | 292               | 25524025 | GSE58506  |
| IMR-90                                      | Wild-type  | Nutlin-3a            | 111,738,375                               | 111,739,417                               | 1042              | 25391375 | GSE58740  |
| HCT 116                                     | Wild-type  | Ionizing radiations  | 111,738,328                               | 111,738,862                               | 534               | 25996291 | GSE60267  |
| p53 binding site identified in <i>INKA2</i> |            |                      | 111,738,593                               | 111,738,611                               | 18                |          |           |
| Promoter region of <i>INKA2</i> isoform 1   |            |                      | 111,739,153                               | 111,740,697                               | 1544              |          |           |
| Promoter region of <i>INKA2</i> isoform 2   |            |                      | 111,755,697                               | 111,756,824                               | 1127              |          |           |

hESCs, human embryonic stem cells; HFK, human foreskin keratinocytes; 5-FU, 5-fluorouracil; ADR, adriamycin.

**Table SVII. Genomic locations of p53 ChIP-seq peaks from ChIPBase database and *Inka2/Fam212b* binding site and promoter region.**

| <b>Cell type</b> | <b>p53 status</b> | <b>Biological condition</b>                 | <b>Start position</b> | <b>End position</b> | <b>Peak length (bp)</b> | <b>PMID</b> | <b>GSE ID</b> |
|------------------|-------------------|---------------------------------------------|-----------------------|---------------------|-------------------------|-------------|---------------|
| MEF              | Wild-type         | ADR                                         | 105,704,618           | 105,705,708         | 1090                    | 25883152    | GSE55727      |
|                  |                   | p53 binding site identified in <i>Inka2</i> | 105,705,367           | 105,705,385         | 18                      |             |               |
|                  |                   | Promoter region of <i>Inka2</i> isoform 1   | 105,703,598           | 105,704,767         | 1169                    |             |               |
|                  |                   | Promoter region of <i>Inka2</i> isoform 2   | 105,703,921           | 105,705,558         | 1637                    |             |               |

MEF, mouse embryonic fibroblasts; ADR, adriamycin.
